# Supplementary material for: Improving e-discharge letters for Permanent pacemaker insertions at Wansbeck General Hospital
Source: PubMed Central journal article supplement — BMJ Qual Improv Rep. 2013 Aug 21;2(1):u201251.w772. doi: 10.1136/bmjquality.u201251.w772 (PMC4652730; doi:10.1136/bmjquality.u201251.w772), 2013-08-21

Fig 1. Percentage of discharge letters containing required information prior to introduction of proforma

|                         | Date | Indication | Type | Make/Model | Route | Complications | CXR | Check | F/U | CC Cardio |
|-------------------------|------|------------|------|------------|-------|---------------|-----|-------|-----|-----------|
| <b>Pre Proforma (%)</b> | 30   | 50         | 90   | 0          | 10    | 70            | 90  | 90    | 100 | 0         |

Fig 2. Graph and table to show percentage of discharge letters containing required information prior to, in the month following and in the year following introduction of a discharge proforma.

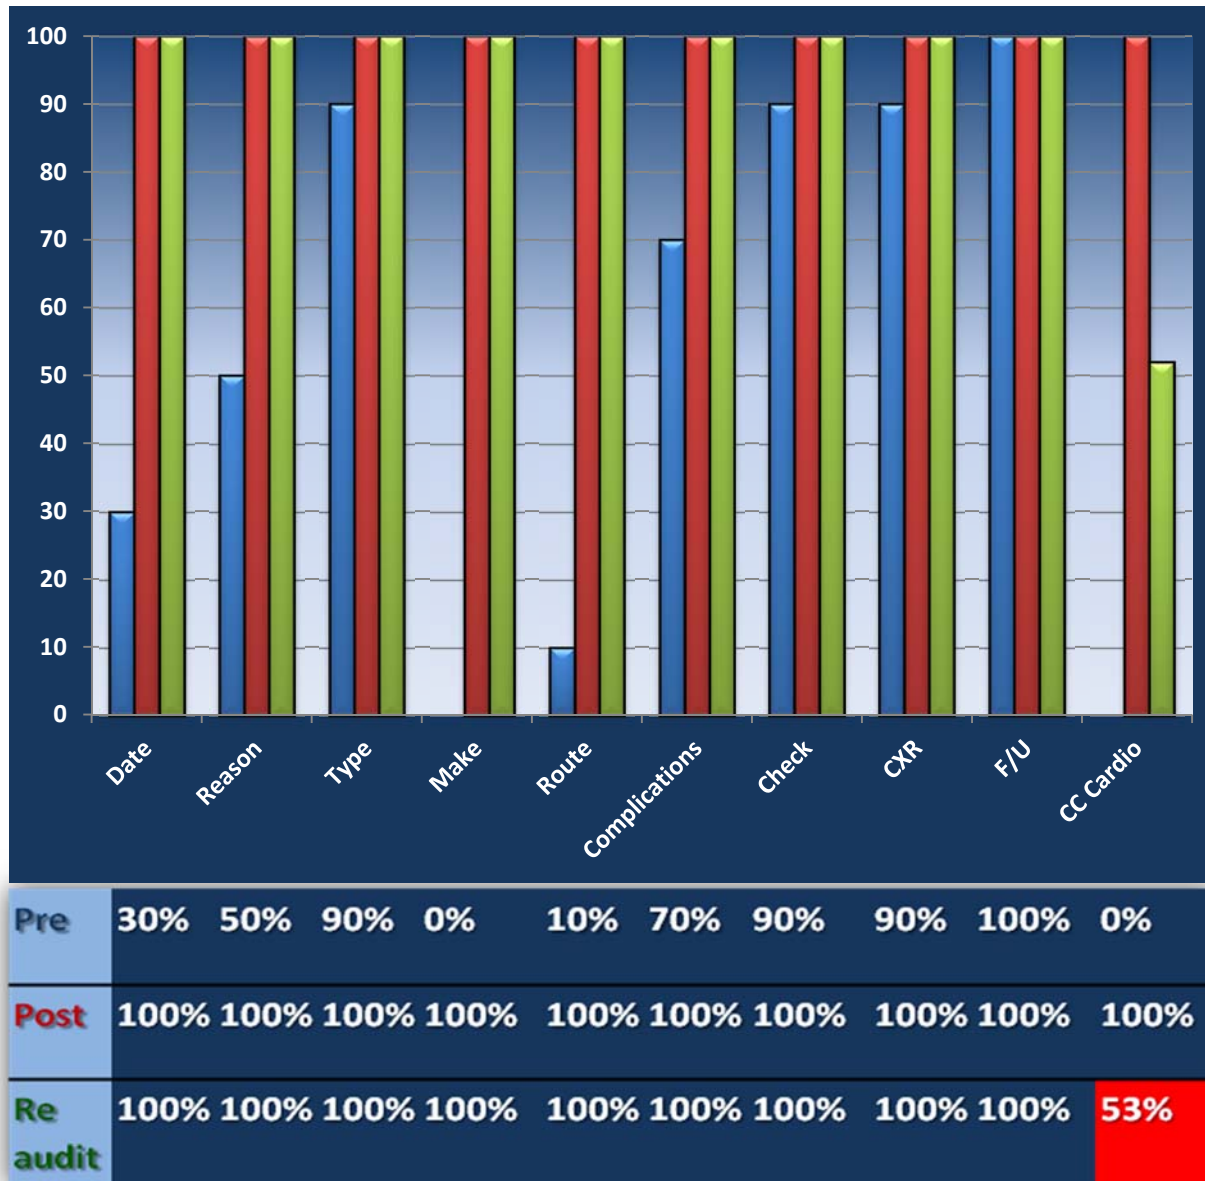

Supplement: bmjqir-2-u201251-w772-s1.pdf [file bmjqir-2-u201251-w772-s1.pdf]
